# Supplementary material for: On the Relationship between Corneal Biomechanics, Macrostructure and Optical Properties
Source: Preprints.org preprint supplement (doi:10.20944/preprints202110.0443.v1), 2021-10-28
Supplement: Supplementary file 2 [file supplementary]

**DOCUMENTO DE INFORMACION Y CONSENTIMIENTO INFORMADO**

**Título:** Estudio sobre la biomecánica corneal.

**Investigador:**  **Tfno:**

**Director:** Francisco Javier Ávila Gómez

**Centro:** Departamento de Física Aplicada, Facultad de Ciencias, Universidad de Zaragoza

1. **Introducción**

Nos dirigimos a usted para solicitar su participación en un trabajo final de grado de investigación que estamos realizando en el Departamento de Física Aplicada de la Universidad de Zaragoza. Su participación es voluntaria, pero es importante para obtener el conocimiento que necesitamos. Antes de tomar una decisión es necesario que:

- Lea este documento entero
- Entienda la información que contiene el documento
- Haga todas las preguntas que considere necesarias
- Firme el consentimiento informado, si decide participar

1. **¿Por qué se le pide participar?**

Se solicita su colaboración como paciente en el estudio para ser portador de lentes de contacto de hidrogel de silicona y ser examinado con instrumentos oftálmicos y ópticos de medida tras un periodo de uso determinado.

1. **¿Cuál es el objetivo de este estudio?**

El objetivo fundamental del trabajo es el estudio del impacto en la biomecánica de la córnea tras el uso de lentes de contacto de hidrogel de silicona tras un periodo de tiempo indicado. Para medir las propiedades biomecánicas de la córnea será empleado el tonómetro de aplanación por aire ORA (del inglés, Ocular Response Analyzer). Así mismo, la geometría de la córnea será monitorizada durante el estudio como una cámara dual de Scheimpflug.

**¿Qué tengo que hacer si decido participar?**

Leer atentamente el documento que posee, firmarlo si se está de acuerdo y seguir las instrucciones del examinador.

La participación del voluntario consistirá en permitir que se registren una serie de medidas con el instrumento de medida, para su posterior análisis. En ningún momento se pedirán datos personales, ni requerirá participación activa durante la medida. El examen completo incluye una serie de medidas de cada ojo a diferentes intervalos de tiempo antes y después de la extracción de la lente de contacto.

1. **¿Qué riesgos o molestias supone?**

El instrumental de medida es no invasivo y de carácter comercial, por lo que supone un riesgo 0. Respecto al uso de lentes de contacto, la molestia es la propia del uso de las mismas pero que jamás supondrá un riesgo al participante ya que se tratan de un producto sanitario de comercialización para centros de visión y contactología.

1. **¿Obtendré algún beneficio por mi participación?**

Al tratarse de un estudio de investigación orientado a generar conocimiento no recibirá ningún beneficio por su participación si bien usted contribuirá al avance científico y al beneficio social.

Usted no recibirá ninguna compensación económica por su participación.

1. **¿Cómo se van a tratar mis datos personales?**

En ningún momento se registrarán datos de carácter personal de los participantes en el estudio. Únicamente se revisarán los datos científicos extraídos de las medidas, que irán identificados con un pseudónimo para diferenciar unos participantes de otros.

Sólo el investigador principal y los directores tendrán acceso a los datos recogidos en el proyecto. Los datos obtenidos serán almacenados en el ordenador de control al que sólo tendrá acceso el investigador principal.

Los datos recogidos solo serán utilizados como material científico para los mismos fines del estudio descrito o para su uso en publicaciones científicas pero siempre manteniendo la confidencialidad de los mismos de acuerdo a la legislación vigente.

El investigador adoptará las medidas necesarias para garantizar la protección de su privacidad y no permitirá que sus datos sean utilizados para cualquier otro fin ajeno a este proyecto de investigación.

1. **¿Puedo cambiar de opinión?**

La participación en este trabajo es totalmente voluntaria, puede decidir no participar o retirarse del estudio en cualquier momento sin tener que dar explicaciones. Basta con que le manifieste su intención al investigador principal del estudio.

1. **¿Qué pasa si me surge alguna duda durante mi participación?**

En la primera página de este documento está recogido el nombre y el teléfono de contacto del investigador responsable del estudio. Puede dirigirse a él en caso de que le surja cualquier duda sobre su participación.

Muchas gracias por su atención, si finalmente desea participar en el estudio le rogamos que firme el documento de consentimiento que hay a continuación.

**DOCUMENTO DE CONSENTIMIENTO INFORMADO**

**Título del TRABAJO:**

Yo, …………………………………………………… (nombre y apellidos del participante)

He leído la hoja de información que se me ha entregado.

He podido hacer preguntas sobre el estudio y he recibido suficiente información sobre el mismo.

He hablado con: …………………………………………….. (nombre del investigador)

Comprendo que mi participación es voluntaria.

Comprendo que puedo retirarme del estudio:

1. Cuando quiera
2. Sin tener que dar explicaciones

Presto libremente mi consentimiento para participar en este estudio y doy mi consentimiento para el acceso y empleo de mis datos como se menciona en la hoja de información que se me ha entregado.

Firma del participante: …………………………………..

Fecha: .………………………………….

He explicado la naturaleza y propósito del estudio al participante mencionado

Firma del investigador: ………………………………….

Fecha: ………………………………….
